# Supplementary material for: Malignant Precursor Cells Pre-Exist in Human Breast DCIS and Require Autophagy for Survival
Source: PLoS One. 2010 Apr 20;5(4):e10240. doi: 10.1371/journal.pone.0010240 (PMC2857649; doi:10.1371/journal.pone.0010240)
Supplement: Table S1 — Validated primary antibodies for Reverse Phase Protein Microarray analysis. (0.03 MB XLS) [file pone.0010240.s009.xls]

## Sheet: Validated Antibodies for RPMA
Table S1. Validated primary antibodies for Reverse Phase Protein Microarray analysis.
Antibody	Vendor	Polyclonal/Monoclonal	Function
Beta Actin	Cell Signaling Technology	Polyclonal	Cytoskeletal
AKT	Cell Signaling Technology	Polyclonal	Growth/Prosurvival
AKT Ser473	Cell Signaling Technology	Polyclonal	Growth/Prosurvival
AKT Thr308	Cell Signaling Technology	Polyclonal	Growth/Prosurvival
AMPK alpha1 Ser485	Cell Signaling Technology	Polyclonal	Hypoxia/Stress
AMPK beta1 Ser108	Cell Signaling Technology	Polyclonal	Hypoxia/Stress
Atg5	Cell Signaling Technology	Polyclonal	Autophagy
Bak	Cell Signaling Technology	Polyclonal	Apoptosis
Bad Ser136	Cell Signaling Technology	Polyclonal	Apoptosis
BCL-XL	Cell Signaling Technology	Polyclonal	Apoptosis
Bcl-2 Ser70	Cell Signaling Technology	Polyclonal	Apoptosis
Bcl-2 Thr56	Cell Signaling Technology	Polyclonal	Apoptosis
Beclin1	Cell Signaling Technology	Polyclonal	Autophagy
B-Raf Ser445	Cell Signaling Technology	Polyclonal	Growth/Prosurvival
C-Raf Ser338	Cell Signaling Technology	Polyclonal	Growth/Prosurvival
Caspase-9, cleaved Asp330	Cell Signaling Technology	Polyclonal	Apoptosis
Beta Catenin Ser33/37/Thr41)	Cell Signaling Technology	Polyclonal	Adhesion/Differentitation
CD133 (W6B3C1)	Miltenyi	Monoclonal	Stem cell marker
CD24 (FL-80)	Santa Cruz Biotechnology	Polyclonal	Stem cell marker
CD44 (156-3C11)	Cell Signaling Technology	Monoclonal	Stem cell marker
Cox-2	BD Biosciences	Monoclonal	Stress/inflammation
E-Cadherin	Cell Signaling Technology	Polyclonal	Adhesion
EGFR Tyr992	Cell Signaling Technology	Polyclonal	Growth factor receptor
EGFR Tyr1045	Cell Signaling Technology	Polyclonal	Growth factor receptor
EGFR Tyr1068	Cell Signaling Technology	Polyclonal	Growth factor receptor
EGFR Tyr1148	Invitrogen	Polyclonal	Growth factor receptor
EGFR Tyr1173	Cell Signaling Technology	Polyclonal	Growth factor receptor
EGFR	Cell Signaling Technology	Polyclonal	Growth factor receptor
ErbB2/HER2	Cell Signaling Technology	Polyclonal	Growth factor receptor
ErbB2/HER2 (Y1248)	Millipore	Polyclonal	Growth factor receptor
ErbB3/HER3 (Y1289) (21D3)	Cell Signaling Technology	Polyclonal	Growth factor receptor
ERK 1/2 Thr202/Tyr204)	Cell Signaling Technology	Polyclonal	Growth/Prosurvival
FAK Tyr576/577	Cell Signaling Technology	Polyclonal	Adhesion
Fibronectin	Abcam	Monoclonal	Adhesion
Fox01 Thr24/Fox03a Thr32	Cell Signaling Technology	Polyclonal	Cycle cell arrest/Apoptosis
Gab1 Tyr627	Cell Signaling Technology	Polyclonal	Adaptor protein/signal transduction
Grb2	Cell Signaling Technology	Polyclonal	Adaptor protein/signal transduction
GSK-3alpha Tyr279/beta Tyr216	Invitrogen	Polyclonal	Glucose Metabolism
GSK-3alpha/beta Ser21/9	Cell Signaling Technology	Polyclonal	Glucose Metabolism
Integrin alpha5/beta1	Millipore	Monoclonal	Adhesion
IGF-1 Rec Tyr1131/IR Tyr1146	Cell Signaling Technology	Polyclonal	Insulin Receptor
IRS-1 Ser612	Cell Signaling Technology	Polyclonal	Glucose Metabolism
LC3B	Cell Signaling Technology	Polyclonal	Autophagy
MAPK pTEpY	Promega	Polyclonal	Growth/Differentiation
MEK1/2 Ser217/221	Cell Signaling Technology	Polyclonal	Growth/Prosurvival
Met Tyr1234/1235	Cell Signaling Technology	Polyclonal	Epithelial/Mesenchymal Transition
MMP-14	Abcam	Monoclonal	Invasion
MMP-9	Cell Signaling Technology	Polyclonal	Invasion
mTOR Ser2448	Cell Signaling Technology	Polyclonal	Growth/Prosurvival
Musashi	Cell Signaling Technology	Polyclonal	Stem cell marker
Nanog	Cell Signaling Technology	Polyclonal	Stem cell marker
N-Cadherin	Cell Signaling technology	Polyclonal	Adhesion
NF-kappaB Ser536	Cell Signaling Technology	Polyclonal	Proteasome Degradation/Inflammation
Nodal	Millipore	Monoclonal	Stem cell marker
p38 Thr180/Tyr182	Cell Signaling Technology	Polyclonal	Stress/inflammation
p70 S6 Kinase Thr389	Cell Signaling Technology	Polyclonal	Growth/Prosurvival
PARP, cleaved (D214)	Cell Signaling Technology	Polyclonal	Apoptosis
PI3 Kinase	BD Biosciences	Monoclonal	Growth/Prosurvival
PTEN	Cell Signaling Technology	Polyclonal	Tumor suppressor
PTEN Ser380	Cell Signaling Technology	Polyclonal	Tumor suppressor
Smad2 Ser465/467	Cell Signaling Technology	Polyclonal	Growth/Differentiation
Src Tyr416	Cell Signaling Technology	Polyclonal	Growth/Differentiation
STAT3 Ser727	Cell Signaling Technology	Polyclonal	Stress/Inflammation
STAT3 Tyr705 (9E12)	Cell Signaling Technology	Polyclonal	Stress/Inflammation
STAT5 Tyr694	Cell Signaling Technology	Polyclonal	Stress/Inflammation
SUPT3H	Abnova	Monoclonal	Transcription
Survivin	Cell Signaling Technology	Polyclonal	Apoptosis
TIMP2	Abcam	Monoclonal	Invasion
