# Supplementary material for: Malignant Precursor Cells Pre-Exist in Human Breast DCIS and Require Autophagy for Survival
Source: PLoS One. 2010 Apr 20;5(4):e10240. doi: 10.1371/journal.pone.0010240 (PMC2857649; doi:10.1371/journal.pone.0010240)
Supplement: Table S2 — Verification of DCIS progenitor cell phenotype: Reverse Phase Protein Microarray analysis of DCIS cultured epithelial cells, spheroids and stromal fibroblasts. (0.04 MB XLS) [file pone.0010240.s010.xls]

## Sheet: Verification Set
Table S2. Verification of DCIS progenitor cell phenotype: Reverse Phase Protein Microarray analysis of DCIS cultured epithelial cells, spheroids and stromal fibroblasts.
Protein	Epithelial Cells (n=6)						Epithelial Mean	Epithelial SD	Epithelial SEM	Spheroids (n=2)		Spheroids Mean	Spheroids SD	Spheroids SEM	Fibroblasts (n=2)		Fibroblasts Mean	Fibroblasts SD	Fibroblasts SEM
AMPKa1 Ser485	31.6432	24.5856	14.2175	16.4805	27.5671	20.1982	22.4487	6.6894	2.73094	82.6374	47.6576	65.1475	24.7345	17.4899	12.6464	12.7945	12.7205	0.104767	0.0740812
Atg5	71.1358	213.861	51.8573	50.5432	54.1648	72.267	85.6381	63.5507	25.9445	278.063	670.734	474.398	277.66	196.335	165.608	282.73	224.169	82.8181	58.5612
Beclin-1	29.7442	16.4895	13.7406	14.2015	15.5302	17.8418	17.9246	5.98113	2.44179	67.7235	16.9446	42.3341	35.9061	25.3895	5.26484	0	2.63242	3.72281	2.63242
Nanog	34.102	73.7826	38.0279	39.4869	43.9991	50.6311	46.6716	14.4371	5.89394	215.673	232.268	223.971	11.7342	8.29735	61.1158	88.9843	75.0501	19.7059	13.9342
LC3B	60.411	135.61	69.5054	64.3249	55.574	90.6846	79.3517	30.1342	12.3022	320.026	449.533	384.78	91.5747	64.7531	278.095	257.335	267.715	14.6799	10.3802
N-Cadherin	14.8989	23.1468	26.3828	27.2129	27.7772	33.3804	25.4665	6.14676	2.5094	137.345	166.92	152.133	20.9127	14.7875	15.5752	40.2561	27.9156	17.452	12.3405
p53 Ser15	18.2756	45.7907	21.8805	22.3748	29.8291	29.0818	27.8721	9.84463	4.01905	106.85	269.247	188.049	114.833	81.1989	47.2363	85.4147	66.3255	26.9962	19.0892
TLR3	58.6732	62.32	113.75	103.733	97.2774	124.976	93.455	27.2209	11.1129	590.815	2796.48	1693.65	1559.64	1102.83	4.48681	N/A	4.48681	ND	ND
SUPT3H	48.0812	N/A	48.4775	46.8433	46.5542	60.5802	50.1073	5.9102	2.41283	206.468	117.427	161.947	62.9609	44.5201	15.6429	15.2655	15.4542	0.266876	0.18871
LAMP2	83.9953	40.4749	51.9884	64.2094	50.8431	68.2057	59.9528	15.4278	6.29836	612.584	199.422	406.003	292.15	206.581	59.1347	N/A	59.1347	ND	ND
Fibronectin	91.0349	336.846	106.837	64.8561	82.2999	48.5921	121.744	107.31	43.8092	173.121	157.51	165.315	11.0388	7.80563	721.259	403.838	562.549	224.451	158.711
Laminin5, gamma-2 chain	59.7177	228.983	59.8664	50.0952	71.0492	69.2004	89.8186	68.5933	28.0031	360.741	663.388	512.064	214.004	151.323	108.38	243.595	175.987	95.6115	67.6075
CD44	85.1252	65.1498	74.4496	64.3348	76.4566	64.168	71.614	8.53533	3.48453	300.874	139.903	220.389	113.824	80.4857	68.951	N/A	68.951	ND	ND
CD133	34.0471	20.2943	30.6533	25.6433	26.275	29.7548	27.778	4.78117	1.9519	138.409	136.794	137.601	1.14211	0.807595	26.4045	N/A	26.4045	ND	ND
AKT Ser473	16.2044	157.092	43.8617	33.546	22.6539	23.9208	49.5464	53.5648	21.8677	119.46	37.3546	78.4074	58.0573	41.0527	63.097	61.8589	62.478	0.87546	0.619044
AKT Thr308	22.9879	N/A	40.2752	38.1713	32.4265	42.4765	35.2675	7.81567	3.19074	207.562	358.137	282.85	106.473	75.2876	130.31	111.132	120.721	13.5613	9.58927
BetaCatenin Ser33	17.6844	59.9633	44.9423	42.3151	41.8305	53.5583	43.3823	14.4557	5.90152	211.434	302.837	257.135	64.632	45.7017	51.1766	74.0517	62.6141	16.1752	11.4376
EGFR	70.1231	128.241	80.525	75.0655	78.2369	92.8488	87.5067	21.3516	8.71677	367.949	302.716	335.333	46.1266	32.6165	109.56	95.4068	102.483	10.0078	7.07655
FOXO1/O3a Thr24/Thr32	40.9702	152.311	76.5487	74.4706	52.9015	67.6071	77.4683	39.1004	15.9627	349.584	273.692	311.638	53.6637	37.946	79.2673	88.2136	83.7405	6.32601	4.47317
Her2	1.41591	7.70282	10.871	2.40765	1.39043	2.87617	4.44399	3.9249	1.60233	3.5948	23.1131	13.354	13.8016	9.75917	N/A	N/A	ND	ND	ND
IRS-1 Ser612	22.295	139.787	45.4219	39.2725	30.6576	47.1737	54.1013	43.0036	17.5562	196.41	276.274	236.342	56.4726	39.9322	113.787	181.678	147.732	48.0064	33.9456
MEK1/2 Ser217	51.3193	351.068	94.7994	90.495	93.4619	112.307	132.242	109.068	44.5268	548.647	725.502	637.075	125.056	88.4276	350.077	333.745	341.911	11.5482	8.16584
Met Y1234/1235	27.5469	50.1218	45.5796	44.6093	37.4597	51.2235	42.7568	8.90762	3.63652	226.656	230.813	228.734	2.93926	2.07837	39.5276	49.8682	44.6979	7.31195	5.17033
MMP-9	14.5056	20.2278	17.5902	14.965	11.6699	13.4205	15.3965	3.06351	1.25067	70.6379	45.7256	58.1817	17.6157	12.4562	20.1804	34.9177	27.5491	10.4208	7.36865
MMP-14	31.6639	54.4232	50.1134	37.2242	42.5038	36.4411	42.0616	8.72856	3.56342	211.79	222.72	217.255	7.72823	5.46468	74.7506	90.4418	82.5962	11.0954	7.84561
mTOR Ser2448	34.495	103.989	71.2828	70.8997	47.0272	74.5897	67.0472	24.1445	9.85695	335.33	209.808	272.569	88.7575	62.761	89.4216	90.1226	89.7721	0.495652	0.350479
p38 Thr180/Tyr182	19.7271	200.128	79.1608	61.874	39.3839	80.4893	80.1271	63.3129	25.8474	308.784	510.543	409.664	142.665	100.88	298.836	273.874	286.355	17.6503	12.4806
PTEN Ser380	40.6704	204.863	65.0898	54.8617	47.7365	71.0273	80.7081	61.8228	25.239	324.087	130.568	227.328	136.839	96.7596	136.398	131.006	133.702	3.81249	2.69583
PTEN	N/A	792.095	109.605	88.9887	97.2961	123.939	242.385	307.58	125.569	636.48	1050.64	843.56	292.854	207.079	740.018	975.778	857.898	166.708	117.88
Integrin alpha5beta1	26.9253	N/A	45.017	24.6985	26.9713	36.2424	31.9709	8.54093	3.48682	174.002	314.422	244.212	99.2914	70.2096	63.1341	138.087	100.611	53	37.4766
